# Supplementary material for: The Adsorption Behaviors and Mechanisms of Humic Substances by Thermally Oxidized Graphitic Carbon Nitride
Source: MDPI journal article supplement (doi:10.3390/toxics11040369), 2023-04-12
Supplement: s1 [file s1]

## Article

# The Adsorption Behaviors and Mechanisms of Humic Substances by Thermally Oxidized Graphitic Carbon Nitride

Hongxin Li <sup>1,2</sup>, Jianlong Wang <sup>1</sup>, Dongbei Yue <sup>2,\*</sup>, Jianchao Wang <sup>3</sup>, Chu Tang <sup>2</sup> and Lingyue Zhang <sup>4</sup>

<sup>1</sup> School of Environment and Energy Engineering, Beijing University of Civil Engineering and Architecture, Beijing, 100044, China

<sup>2</sup> School of Environment, Tsinghua University, Beijing 100084, China

<sup>3</sup> School of Chemical and Environmental Engineering, China University of Mining and Technology (Beijing), Beijing, 100083, China

<sup>4</sup> School of Department of Civil Engineering, The University of Hong Kong, Pokfulam, Hong Kong, SAR 999077, China

\* Correspondence: author: Dongbei Yue (E-mail: yuedb@tsinghua.edu.cn; phone/Fax number: +86 10-62771931)

## Supporting Information

### Figures:

**Figure S1** The experimental instrument used in this study.

**Figure S2** The adsorption capacities and removal rate (%) of HA by the bulk g-C<sub>3</sub>N<sub>4</sub> and TCNs.

**Figure S3** The adsorption kinetics of HA on the bulk g-C<sub>3</sub>N<sub>4</sub>.

**Figure S4** The effect of pH for adsorption of HSs on TCN-600.

**Figure S5** The zeta potential of TCN-600 as a function of pH.

**Figure S6** The particle size distributions of HA and FA as a function of pH.

**Figure S7** The removal rate of HA and FA at low initial concentration.

**Figure S8** The removal rates measured as UV<sub>254</sub> of landfill leachate concentrate on the TCN-600.

### Tables:

**Table S1** The detailed experimental parameters adopted in this study.

**Table S2** The relative content of surface elements (%) of XPS spectra peaks of the bulk g-C<sub>3</sub>N<sub>4</sub> and TCNs before and after adsorption of HSs.

**Table S3** The relative contents (%) of peaks in the N 1s and C 1s core region of the bulk g-C<sub>3</sub>N<sub>4</sub> and TCNs.

**Table S4** Kinetics parameters for adsorption of HSs on the bulk g-C<sub>3</sub>N<sub>4</sub> and TCNs.

**Table S5** The parameters of adsorption isotherms for adsorption of HSs on TCN-600.

**Table S6** A comparison for adsorption of HSs on various adsorbents.

**Table S7** Thermodynamic parameters for adsorption of HSs on TCN-600.

**Table S8** The relative contents (%) of peaks in the N 1s and C 1s core region of TCN-600 before and after adsorption of HSs.

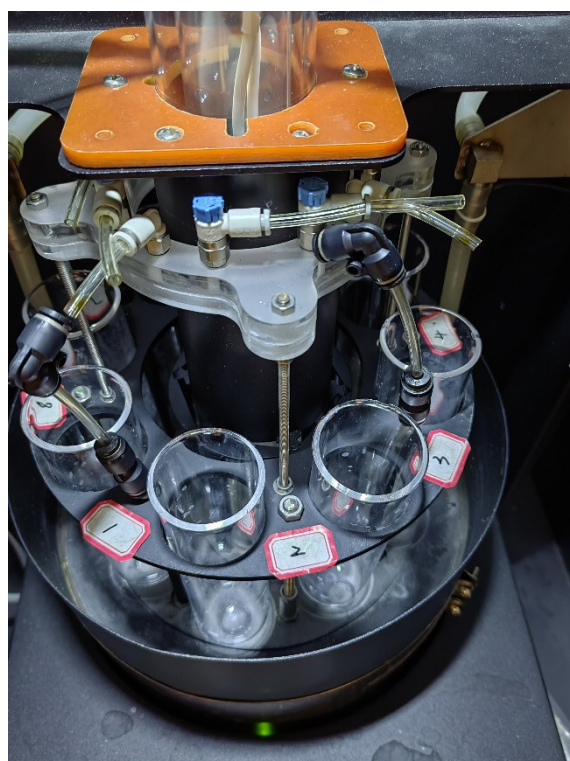

**Figure S1.** The experimental instrument used in this study.

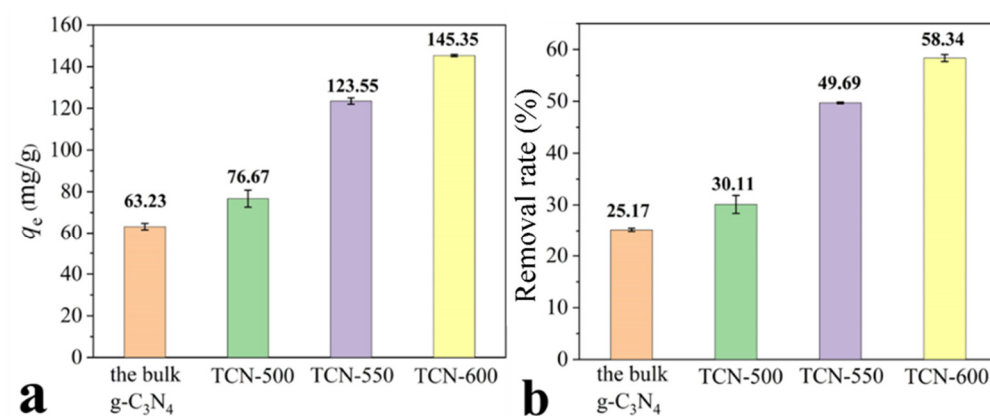

**Figure S2.** The adsorption capacities (a) and removal rate (%) (b) of HA by the bulk  $g-C_3N_4$  and TCNs ( $C_{HA} = 100$  mg/L, pH = 3.0, T = 298 K, the adsorbents C = 0.4 g/L, t = 240 min, and I = 0.01 M).

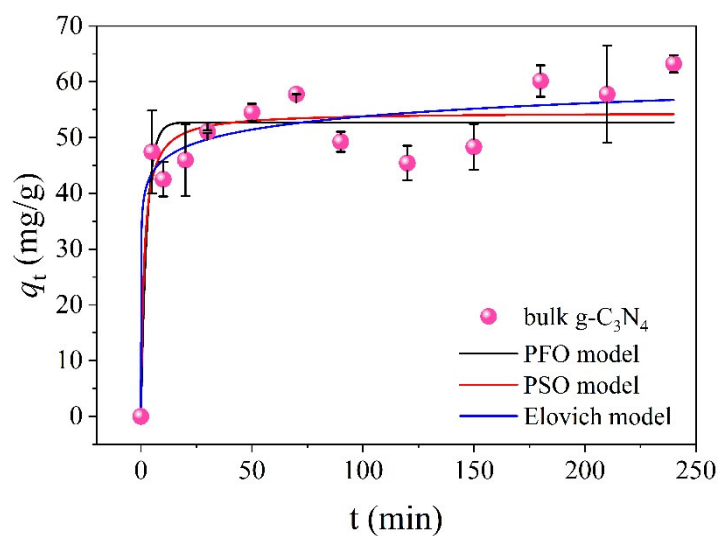

**Figure S3.** The adsorption kinetics of HA on the bulk g-C<sub>3</sub>N<sub>4</sub> ( $C_{\text{HSS}} = 100 \text{ mg/L}$ ,  $\text{pH} = 3.0$ ,  $T = 298.15 \text{ K}$ ,  $C = 0.4 \text{ g/L}$ , and  $I = 0.01 \text{ M}$ ).

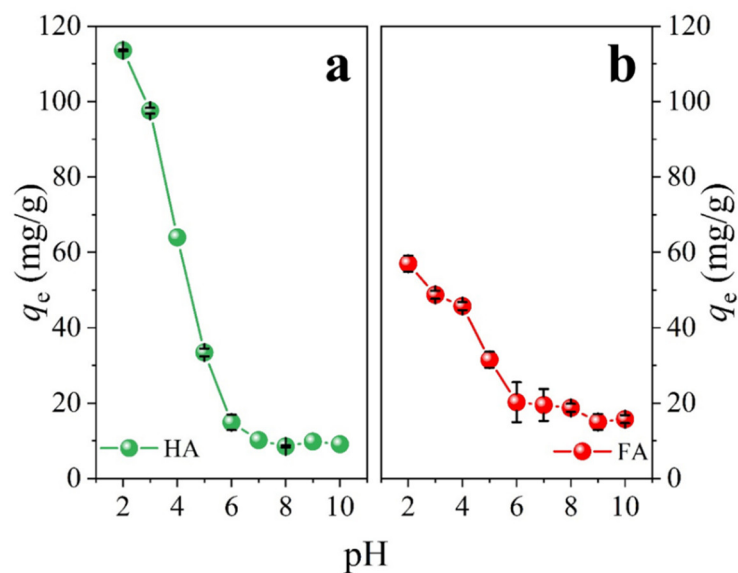

**Figure S4.** The effect of pH on the adsorption of HA (a) and FA (b) on TCN-600 ( $C_{\text{HSS}} = 50 \text{ mg/L}$ ,  $\text{pH} = 2.0\text{--}10.0$ ,  $T = 298.15 \text{ K}$ ,  $C_{\text{TCN-600}} = 0.4 \text{ g/L}$ , and  $I = 0.01 \text{ M}$ ).

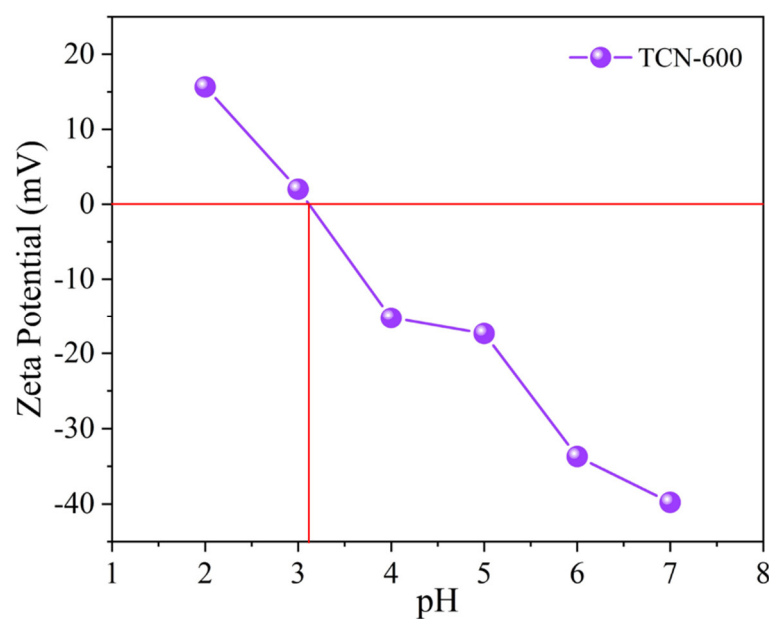

**Figure S5.** The zeta potential of TCN-600 as a function of pH (TCN-600 = 1 g/L).

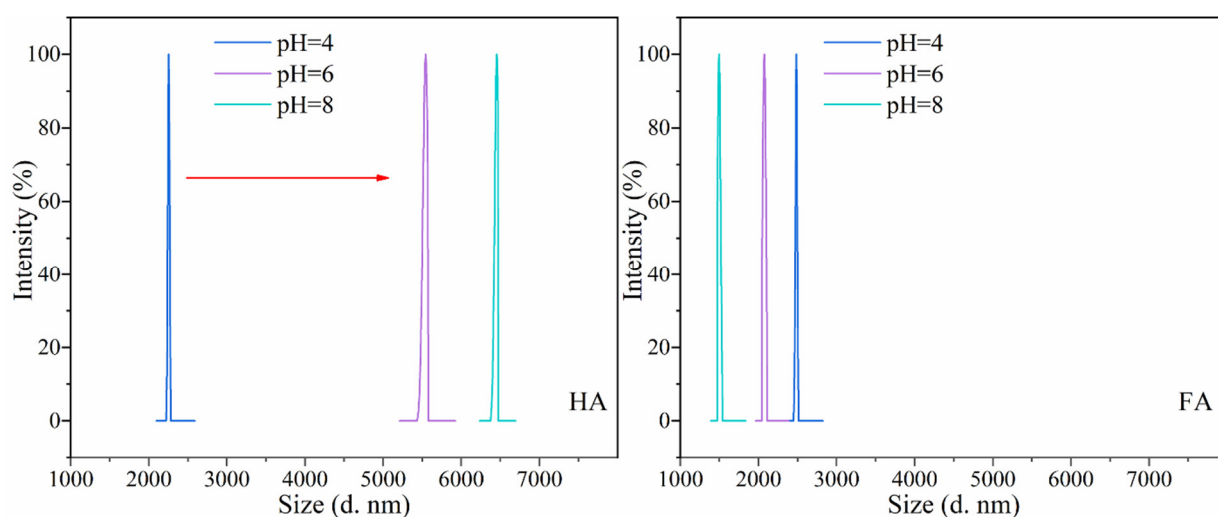

**Figure S6.** The particle size distributions of HA and FA as a function of pH.

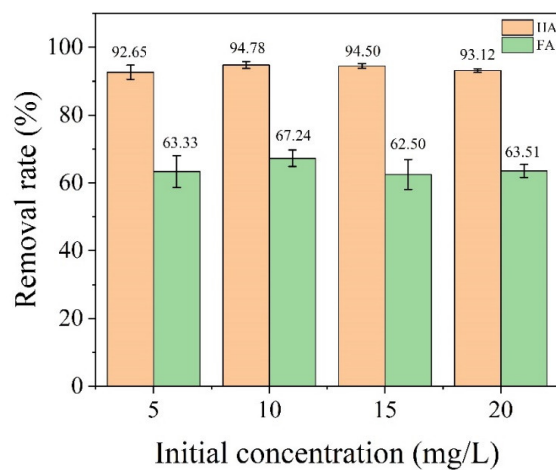

**Figure S7.** The removal rate of HA and FA at low initial concentration ( $C_{HSs} = 5\text{--}20$  mg/L, pH = 3.0,  $T = 298.15$  K,  $C_{TCN-600} = 0.4$  g/L, and  $I = 0.01$  M).

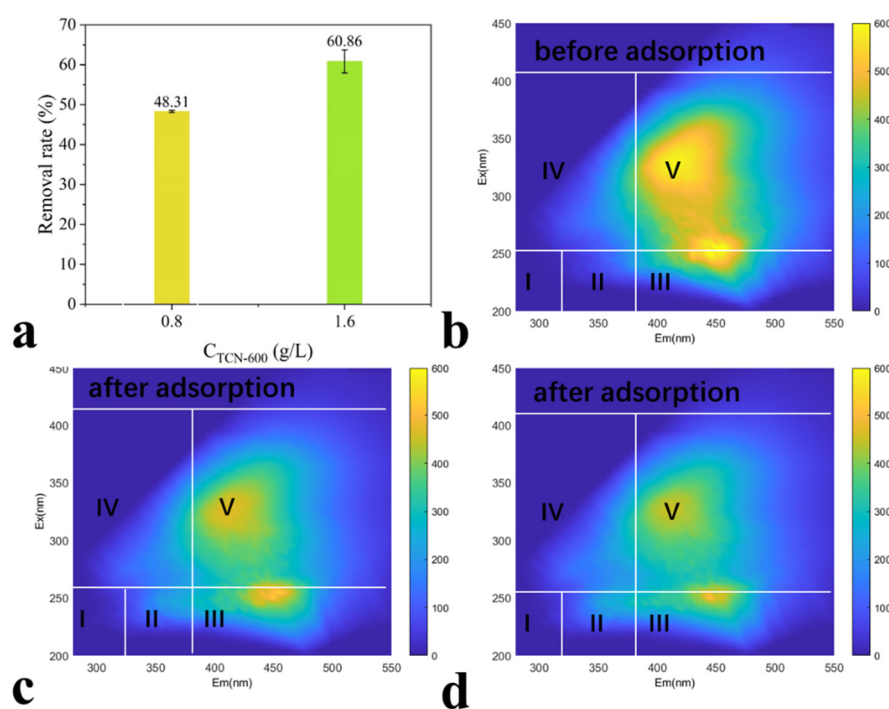

**Figure S8.** The removal rates measured as  $UV_{254}$  of landfill leachate concentrate on the TCN-600 (a), and EEM of landfill leachate concentrate before (b) and after adsorption (c) (TCN-600 = 0.8 g/L) and (d) (TCN-600 = 1.6 g/L) ( $C_{HSs} = 40$  mgC/L, pH = 3.0,  $T = 298.15$  K,  $t = 60$  min) .

**Table S1.** The detailed experimental conditions adopted in this study.

| Procedure                             | t (min) | pH   | $C_{HSs}$ (mg/L) | I (M)  | T (K)                      | C (g/L) | $K^+$ (M) | $Ca^{2+}$ (mM) | $Mg^{2+}$ (mM) |
|---------------------------------------|---------|------|------------------|--------|----------------------------|---------|-----------|----------------|----------------|
| Adsorbent Capacities                  | 240     | 3    | 100              | 0.01   | 298.15                     | 0.4     | 0         | 0              | 0              |
| Kinetics                              | 0–240   | 3    | 100/50           | 0.01   | 298.15                     | 0.4     | 0         | 0              | 0              |
| Intraparticle Diffusion               | 0–240   | 3    | 100/50           | 0.01   | 298.15                     | 0.4     | 0         | 0              | 0              |
| Adsorption Isotherms                  | 120     | 3    | 25–200           | 0.01   | 298.15<br>308.15<br>318.15 | 0.4     | 0         | 0              | 0              |
| Low Initial Concentration Adsorption  | 120     | 3    | 5–20             | 0.01   | 298.15                     | 0.4     | 0         | 0              | 0              |
| pH                                    | 120     | 2–10 | 50               | 0.01   | 298.15                     | 0.4     | 0         | 0              | 0              |
| $Na^+$                                | 120     | 3    | 50               | 0–0.08 | 298.15                     | 0.4     | 0         | 0              | 0              |
| $K^+$                                 | 120     | 3    | 50               | 0.01   | 298.15                     | 0.4     | 0–0.07    | 0              | 0              |
| $Ca^{2+}$                             | 120     | 3    | 50               | 0.01   | 298.15                     | 0.4     | 0         | 0–1.05         | 0              |
| $Mg^{2+}$                             | 120     | 3    | 50               | 0.01   | 298.15                     | 0.4     | 0         | 0              | 0–1.05         |
| Adsorption Landfill Leachate Nitrogen | 60      | 3    | 40 (mgC/L)       | 0      | 298.15                     | 0.4     | 0         | 0              | 0              |
| Adsorption/Desorption Isotherms       | 120     | 3    | 20               | 0.01   | 298.15                     | 0.4     | 0         | 0              | 0              |
| XPS Analysis                          | 120     | 3    | 20               | 0.01   | 298.15                     | 0.4     | 0         | 0              | 0              |

Contact time (t, min); HSs concentration ( $C_{HSs}$ , mg/L); ionic strength (I, M); temperature (T, K); the bulk g- $C_3N_4$  or TCN concentration (C, g).

**Table S2.** The relative content of surface elements (%) of XPS spectra peaks of the bulk g-C<sub>3</sub>N<sub>4</sub> and TCNs before and after adsorption of HSs.

|                   | CNs                                      | C Content (%) | N Content (%) | O Content (%) | C/N (ato. %) |
|-------------------|------------------------------------------|---------------|---------------|---------------|--------------|
| Before Adsorption | The bulk g-C <sub>3</sub> N <sub>4</sub> | 41.69         | 56.36         | 1.95          | 0.740        |
|                   | TCN-500                                  | 41.83         | 56.28         | 1.89          | 0.743        |
|                   | TCN-550                                  | 42.02         | 56.00         | 1.98          | 0.750        |
|                   | TCN-600                                  | 40.94         | 57.65         | 1.41          | 0.710        |
| After Adsorption  | TCN-600 (after HA adsorption)            | 45.49         | 46.61         | 7.90          | 0.976        |
|                   | TCN-600 (after FA adsorption)            | 44.34         | 51.00         | 4.66          | 0.869        |

**Table S3.** The relative contents (%) of peaks in the N 1s and C 1s core region of the bulk g-C<sub>3</sub>N<sub>4</sub> and TCNs.

| The Types of Core Region | Assignments                   | Position (eV) | Relative Contents (%)                    |         |         |         |
|--------------------------|-------------------------------|---------------|------------------------------------------|---------|---------|---------|
|                          |                               |               | The Bulk g-C <sub>3</sub> N <sub>4</sub> | TCN-500 | TCN-550 | TCN-600 |
| N 1s                     | C-N=C                         | 398.8         | 70.25                                    | 68.07   | 70.94   | 69.74   |
|                          | N-(C) <sub>3</sub>            | 399.6         | 14.19                                    | 14.11   | 13.49   | 11.40   |
|                          | N-H                           | 400.9         | 11.86                                    | 13.90   | 11.68   | 12.40   |
|                          | $\pi$ - $\pi^*$               | 404.5         | 3.70                                     | 3.92    | 3.90    | 6.45    |
| C 1s                     | CO <sub>3</sub> <sup>2-</sup> | 284.8         | 10.01                                    | 11.14   | 11.79   | 5.90    |
|                          | N=C-N                         | 288.3         | 87.49                                    | 86.36   | 86.01   | 91.53   |
|                          | $\pi$ - $\pi^*$               | 293.8         | 2.49                                     | 2.50    | 2.20    | 2.56    |

**Table S4.** Kinetics parameters for adsorption of HSs on the bulk g-C<sub>3</sub>N<sub>4</sub> and TCNs.

| HSs                             |    | Pseudo-First-Order-Model |                  |         | Pseudo-Second-Order-Model |                     |         | Elovich Model     |                        |         | $q_{e(e)}$<br>(mg/g) |
|---------------------------------|----|--------------------------|------------------|---------|---------------------------|---------------------|---------|-------------------|------------------------|---------|----------------------|
|                                 |    | $q_{e(c)}$<br>(mg/g)     | $k_1$<br>(1/min) | $R_1^2$ | $q_{e(c)}$<br>(mg/g)      | $k_2$<br>(g/mg·min) | $R_2^2$ | $\beta$<br>(g/mg) | $\alpha$<br>(mg/g·min) | $R_3^2$ |                      |
| The Bulk                        | HA | 52.718                   | 0.852            | 0.838   | 54.514                    | 0.218               | 0.881   | 0.294             | 255339.702             | 0.906   | 63.228               |
| g-C <sub>3</sub> N <sub>4</sub> |    |                          |                  |         |                           |                     |         |                   |                        |         |                      |
| TCN-500                         | HA | 70.440                   | 0.157            | 0.877   | 74.451                    | 0.003               | 0.934   | 0.127             | 599.475                | 0.966   | 76.673               |
| TCN-550                         | HA | 103.301                  | 0.146            | 0.796   | 111.879                   | 0.002               | 0.893   | 0.073             | 308.622                | 0.971   | 123.816              |
| TCN-600                         | HA | 119.711                  | 0.164            | 0.826   | 128.583                   | 0.002               | 0.908   | 0.068             | 665.766                | 0.974   | 145.349              |
|                                 | FA | 44.798                   | 0.344            | 0.971   | 45.982                    | 0.017               | 0.989   | 0.461             | 2.410                  | 0.991   | 46.832               |

**Table S5.** The parameters of adsorption isotherms for adsorption of HSs on TCN-600.

| Isotherm models           |                                         | HA-Temperature (K) |         |         | FA-Temperature (K) |         |         |
|---------------------------|-----------------------------------------|--------------------|---------|---------|--------------------|---------|---------|
|                           |                                         | 298.15             | 308.15  | 318.15  | 298.15             | 308.15  | 318.15  |
| Freundlich Isotherm Model | $1/n$                                   | 0.394              | 0.365   | 0.439   | 0.510              | 0.482   | 0.528   |
|                           | $k_f$ ((mg /g) (L/mg ) <sup>1/n</sup> ) | 28.317             | 36.856  | 37.801  | 8.396              | 9.794   | 8.480   |
|                           | $R^2$                                   | 0.980              | 0.965   | 0.980   | 0.979              | 0.960   | 0.983   |
| Langmuir Isotherm Model   | $b$                                     | 0.034              | 0.052   | 0.031   | 0.015              | 0.018   | 0.014   |
|                           | $q_m$ (mg/g)                            | 221.353            | 226.778 | 358.739 | 149.879            | 144.444 | 170.172 |
|                           | $R^2$                                   | 0.887              | 0.884   | 0.938   | 0.981              | 0.963   | 0.987   |

|                     |              |         |         |         |         |         |         |
|---------------------|--------------|---------|---------|---------|---------|---------|---------|
| Sips Isotherm Model | $q_m$ (mg/g) | 327.879 | 344.771 | 399.766 | 213.575 | 224.371 | 235.362 |
|                     | $k_s$ (L/mg) | 0.012   | 0.015   | 0.025   | 0.006   | 0.006   | 0.007   |
|                     | $1/n$        | 0.667   | 0.621   | 0.877   | 0.769   | 0.714   | 0.794   |
|                     | $R^2$        | 0.947   | 0.943   | 0.951   | 0.985   | 0.966   | 0.989   |

**Table S6.** A comparison for adsorption of HSs on various adsorbents.

| Adsorbent                                                      | $q_{m-HA}$ (mg/g) | $q_{m-FA}$ (mg/g) | References |
|----------------------------------------------------------------|-------------------|-------------------|------------|
| Bentonite Nanoparticles                                        | 58.21             | \                 | 1          |
| Montmorillonite Nanoparticles                                  | 48.20             | \                 |            |
| Chitosan-H <sub>2</sub> SO <sub>4</sub> Beads                  | 377.40            | \                 | 2          |
| Acid-Activated Greek Bentonite                                 | 10.75             | \                 | 3          |
| Layered Double Hydroxides/Hollow Carbon Microsphere Composites | 300.46            | \                 | 4          |
| Powder Activated Carbon (PAC)                                  | 70.00             | \                 | 5          |
| SBA-15                                                         | 8.50              | \                 | 6          |
| Algerian Bentonite                                             | 54.80             | \                 | 7          |
| Fly Ash                                                        | 36.00             | \                 | 8          |
| Magnetic Chitosan                                              | 32.6              | \                 | 9          |
| Cellulose Acetate/Chitosan Nanofiber                           | 238.10            | \                 | 10         |
| Amine-Functionalized Mesoporous Silica                         | \                 | 39.5              | 11         |
| Magnetic Graphene Oxide                                        | 98.82             | 72.4              | 12         |
| This Study                                                     | 331.31            | 185.93            |            |

**Table S7.** Thermodynamic parameters for adsorption of HSs on TCN-600.

| HSs | Temperature (K) | $\Delta G^0$ (kJ/mol) | $\Delta H^0$ (kJ/mol) | $\Delta S^0$ (J/mol K) |
|-----|-----------------|-----------------------|-----------------------|------------------------|
| HA  | 298             | -4.062                | -15.708               | -39.017                |
|     | 308             | -4.296                |                       | -36.992                |
|     | 318             | -3.923                |                       | -37.003                |
| FA  | 298             | -4.331                | -4.652                | -1.074                 |
|     | 308             | -4.282                |                       | -1.199                 |
|     | 318             | -4.257                |                       | -1.239                 |

**Table S8.** The relative contents (%) of peaks in the N 1s and C 1s core region of TCN-600 before and after adsorption of HSs.

| The Types of Core Region | Assignments                   | Position (eV) | Relative Contents (%)     |                             |                             |
|--------------------------|-------------------------------|---------------|---------------------------|-----------------------------|-----------------------------|
|                          |                               |               | TCN-600 Before Adsorption | TCN-600 After HA Adsorption | TCN-600 After FA Adsorption |
| N 1s                     | C-N=C                         | 398.8         | 69.74                     | 47.46                       | 56.31                       |
|                          | N-(C) <sub>3</sub>            | 399.6         | 11.40                     | 33.87                       | 25.98                       |
|                          | N-H                           | 400.9         | 12.40                     | 12.65                       | 11.20                       |
|                          | N*                            | 402.2         | \                         | 1.44                        | 1.15                        |
|                          | $\pi$ - $\pi^*$               | 404.5         | 6.45                      | 4.58                        | 5.36                        |
| C 1s                     | C-C                           | 284.5         | \                         | 5.06                        | 1.93                        |
|                          | CO <sub>3</sub> <sup>2-</sup> | 284.8         | 5.90                      | \                           |                             |
|                          | C=C                           | 285.0         | \                         | 13.11                       | 11.71                       |
|                          | C-O                           | 286.0         | \                         | 4.69                        | 5.64                        |

|                 |       |       |       |       |
|-----------------|-------|-------|-------|-------|
| C=O             | 286.7 | \     | 1.18  | 0.83  |
| N=C-N           | 288.3 | 91.53 | 73.43 | 78.14 |
| $\pi$ - $\pi^*$ | 293.8 | 2.56  | 2.53  | 1.75  |

## References

- Derakhshani, E.; Naghizadeh, A., Optimization of humic acid removal by adsorption onto bentonite and montmorillonite nanoparticles. *J. Mol. Liq.* **2018**, *259*, 76–81.
- Ngah, W. S. W.; Fatinathan, S.; Yosop, N. A., Isotherm and kinetic studies on the adsorption of humic acid onto chitosan-H<sub>2</sub>SO<sub>4</sub> beads. *Desalination* **2011**, *272* (1–3), 293–300.
- Douliia, D.; Leodopoulos, C.; Gimouhopoulos, K.; Rigas, F., Adsorption of humic acid on acid-activated Greek bentonite. *J. Colloid Interface Sci.* **2009**, *340* (2), 131–141.
- Huang, S. Y.; Song, S.; Zhang, R.; Wen, T.; Wang, X. X.; Yu, S. J.; Song, W. C.; Hayat, T.; Alsaedi, A.; Wang, X. K., Construction of Layered Double Hydroxides/Hollow Carbon Microsphere Composites and Its Applications for Mutual Removal of Pb(II) and Humic Acid from Aqueous Solutions. *ACS Sustain. Chem. Eng.* **2017**, *5* (12), 11268–11279.
- Yang, K.; Fox, J. T., Adsorption of Humic Acid by Acid-Modified Granular Activated Carbon and Powder Activated Carbon. *J. Environ. Eng.-ASCE* **2018**, *144* (10), 10.
- Tao, Q.; Xu, Z. Y.; Wang, J. H.; Liu, F. L.; Wan, H. Q.; Zheng, S. R., Adsorption of humic acid to aminopropyl functionalized SBA-15. *Microporous Mesoporous Mater.* **2010**, *131* (1–3), 177–185.
- Wang, Q. Z.; Chen, X. G.; Liu, N.; Wang, S. X.; Liu, C. S.; Meng, X. H.; Liu, C. G., Protonation constants of chitosan with different molecular weight and degree of deacetylation. *Carbohydr. Polym.* **2006**, *65* (2), 194–201.
- Wang, S. B.; Terdkiatburana, T.; Tade, M. O., Single and co-adsorption of heavy metals and humic acid on fly ash. *Sep. Purif. Technol.* **2008**, *58* (3), 353–358.
- Dong, C. L.; Chen, W.; Liu, C., Preparation of novel magnetic chitosan nanoparticle and its application for removal of humic acid from aqueous solution. *Appl. Surf. Sci.* **2014**, *292*, 1067–1076.
- Zhang, Y. R.; Wang, F.; Wang, Y. X., Electrospun Cellulose Acetate/Chitosan Fibers for Humic Acid Removal: Construction Guided by Intermolecular Interaction Study. *ACS Appl. Polym. Mater.* **2021**, *3* (10), 5022–5029.
- Jayalath, S.; Larsen, S. C.; Grassian, V. H., Surface adsorption of Nordic aquatic fulvic acid on amine-functionalized and non-functionalized mesoporous silica nanoparticles. *Environ. Sci.-Nano* **2018**, *5* (9), 2162–2171.
- Zhang, J.; Gong, J. L.; Zenga, G. M.; Ou, X. M.; Jiang, Y.; Chang, Y. N.; Guo, M.; Zhang, C.; Liu, H. Y., Simultaneous removal of humic acid/fulvic acid and lead from landfill leachate using magnetic graphene oxide. *Appl. Surf. Sci.* **2016**, *370*, 335–350.

**Disclaimer/Publisher's Note:** The statements, opinions and data contained in all publications are solely those of the individual author(s) and contributor(s) and not of MDPI and/or the editor(s). MDPI and/or the editor(s) disclaim responsibility for any injury to people or property resulting from any ideas, methods, instructions or products referred to in the content.
